# Supplementary material for: Stretchable supercapacitor based on a cellular structure
Source: Royal Society of Chemistry journal article supplement (doi:10.1039/c6ta03762c), 2016-01-01
Supplement: c6ta03762c1.pdf [file c6ta03762c1.pdf]

## Supporting Information

### Stretchable supercapacitor based on a cellular structure

*Sisi He,<sup>a</sup> Jingyu Cao,<sup>a</sup> Songlin Xie,<sup>a</sup> Jue Deng,<sup>a</sup> Qiang Gao,<sup>ab</sup> Longbin Qiu,<sup>a</sup> Jing Zhang,<sup>a</sup> Lie Wang,<sup>a</sup> Yajie Hu,<sup>a</sup> Huisheng Peng<sup>\*a</sup>*

*<sup>a</sup>State Key Laboratory of Molecular Engineering of Polymers, Department of Macromolecular Science and Laboratory of Advanced Materials, Fudan University, Shanghai 200438, China; E-mail: penghs@fudan.edu.cn.*

*<sup>b</sup>Key Laboratory of Science and Technology of Eco-Textiles, Ministry of Education, Jiangnan University, Wuxi 214122, China*

## Experimental section

*Characterization.* The structures were characterized by scanning electron microscopy (SEM) (Hitachi FE-SEM S-4800), transmission electron microscope (TEM) (JEOL JEM-2100F) and Raman spectrometer (XploRA, HORIBA JobinYvon, France). The photographs were taken by a digital camera (Nikon, J1). The electrical conductivities were measured by Keithley Model 2400 Source Meter. The thicknesses were obtained using a surface profiler (Veeco, Dektak 150). The weight of the carbon nanotube (CNT) film was measured by using a microbalance (Sartorius SE2). The mechanical properties of the fibers were tested by a HY0350 Table-top Universal Testing Instrument with a tensile rate of 1 mm/min. The films were fixed on a paper hole with a gauge length of 5 mm by silver paste. Galvanostatic charge-discharge curves and cyclic voltammograms were conducted at an electrochemical analyzer system (CHI 660D). Cyclic galvanostatic charge-discharge measurements were characterized from an ARBIN electrochemical workstation (MSTAT-5 V/10 mA/16 Ch).

*Calculation of electrochemical parameters.* The areal capacitance ( $C_A$ ), gravimetric capacitance ( $C_M$ ) and volumetric capacitance ( $C_V$ ) were calculated by the following equations:  $C_A = 2 \times I \times \Delta t / (S \times \Delta U)$ ,  $C_V = 2 \times I \times \Delta t / (V \times \Delta U)$ ,  $C_M = 2 \times I \times \Delta t / (m \times \Delta U)$ , where  $I$ ,  $\Delta t$  and  $\Delta U$  are discharge current, discharge time and voltage window, respectively.  $S$ ,  $m$  and  $V$  are the total surface area, mass and volume of the electrode, respectively. Here,  $m$  was measured by using a microbalance, typically 0.619 mg for a CNT film with an area of 0.36 cm<sup>2</sup>. The weight of polyaniline (PANI) in the PANI/CNT composite film had been calculated by the total Faradic charge consumed in the electropolymerization reaction by assuming an average of 2.5 electrons per monomer.<sup>S1</sup> For instance, when the weight of aligned CNT film was 0.619 mg, the weight of PANI at the content of 5% can be calculated as 0.0295 mg. The volume ( $V$ ) of the electrode can be obtained by  $V = L \times W \times H$ , where  $L$ ,  $W$ , and  $H$  represent the length, width and thickness of the CNT film, respectively. In a symmetrical supercapacitor, we obtain  $1/C = 1/C_1 + 1/C_2 = 2/C_E$ , where  $C$  is the capacitance of supercapacitor and  $C_E$  is the capacitance of a single electrode. Therefore, the gravimetric capacitance of supercapacitor  $C_S = 0.25 \times C_M$ . The gravimetric energy density ( $E_M$ ) and gravimetric power density ( $P_M$ ) can be expressed as:  $E_M = 0.5 \times C_S \times U^2 = 0.125 \times C_S \times U^2$  and  $P_M = E_M \times 3600/\Delta t$ .

## Reference

S1. H. Lin, L. Li, J. Ren, Z. Cai, L. Qiu, Z. Yang, H. Peng, *Sci. Rep.* 2013, **3**, 1353.

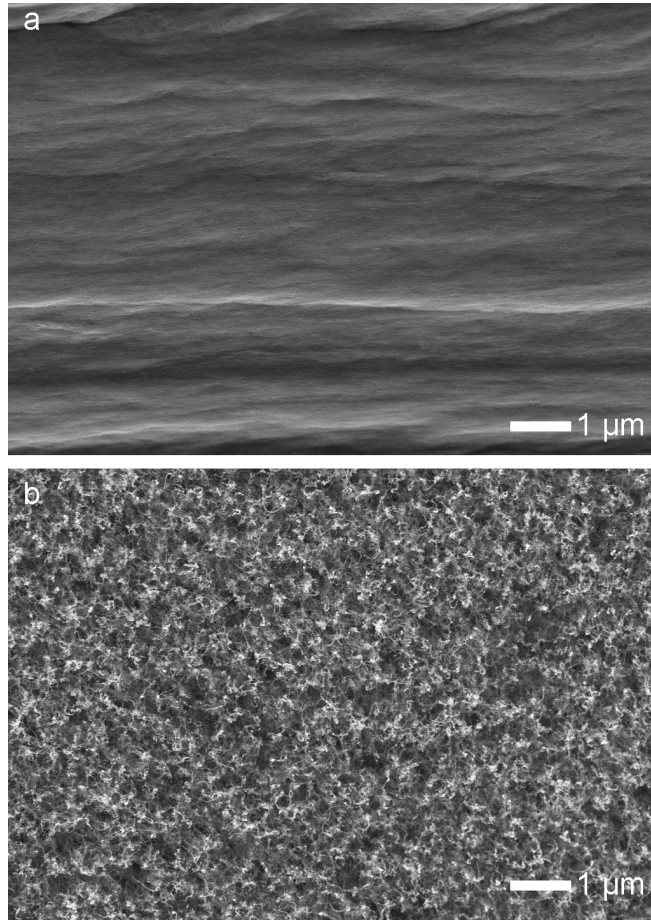

**Figure S1.** SEM images of the CNT film by side (a) and top (b) views.

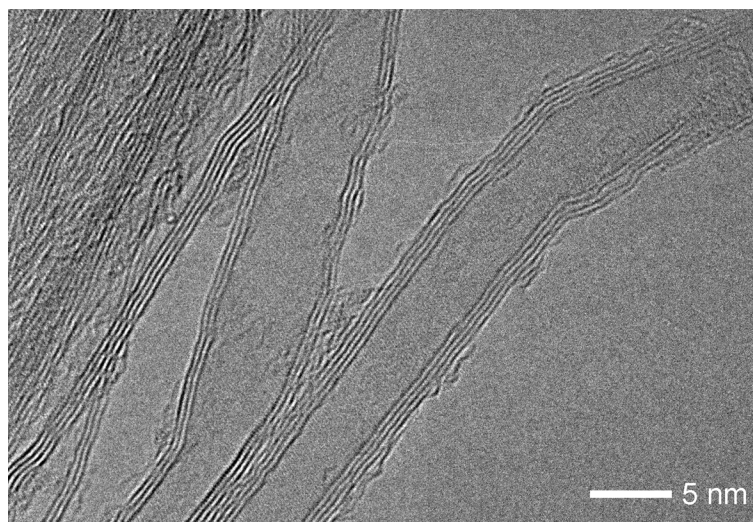

**Figure S2.** TEM image of the CNTs.

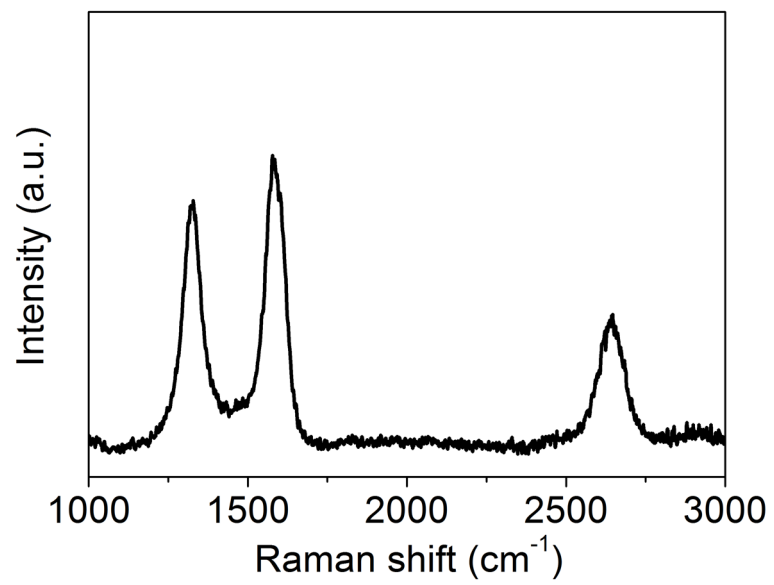

**Figure S3.** Raman spectrum of the CNTs.

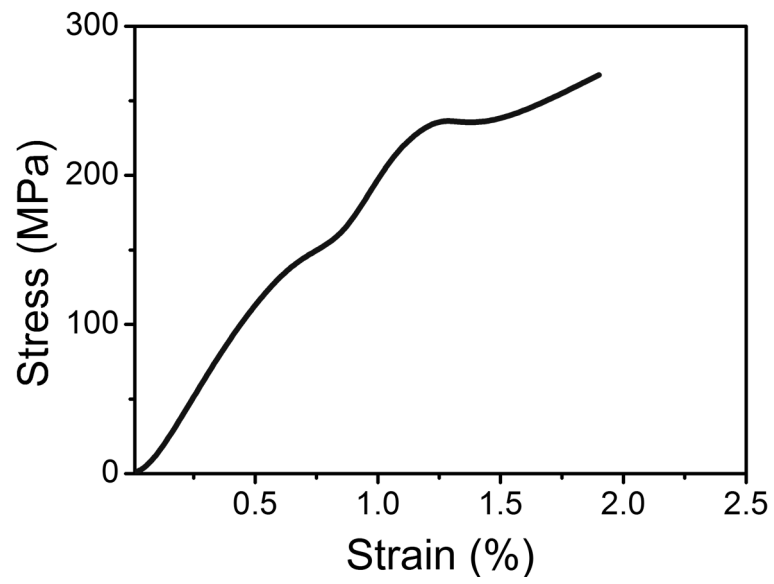

**Figure S4.** Stress-strain curve of a CNT film without the cellular structure.

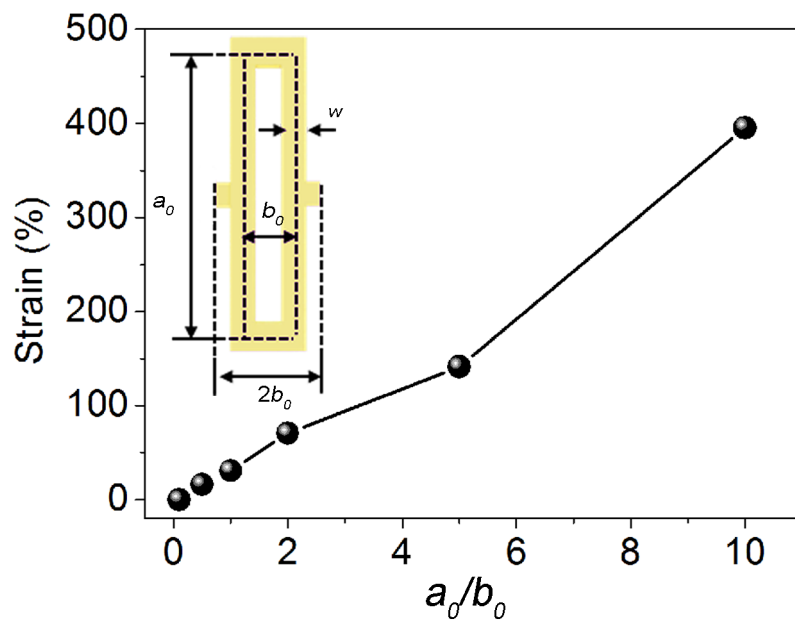

**Figure S5.** Dependence of strain on  $a_0/b_0$  with  $w$  of 1 mm (inserted, the schematic of a basic unit of the stretchable CNT film).



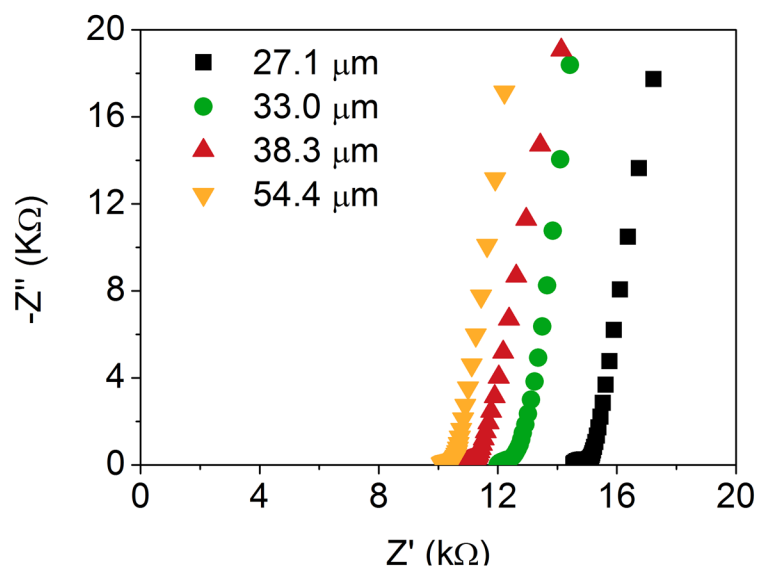

**Figure S6.** Nyquist plot of the supercapacitors with the increasing thickness of the CNT film electrode.

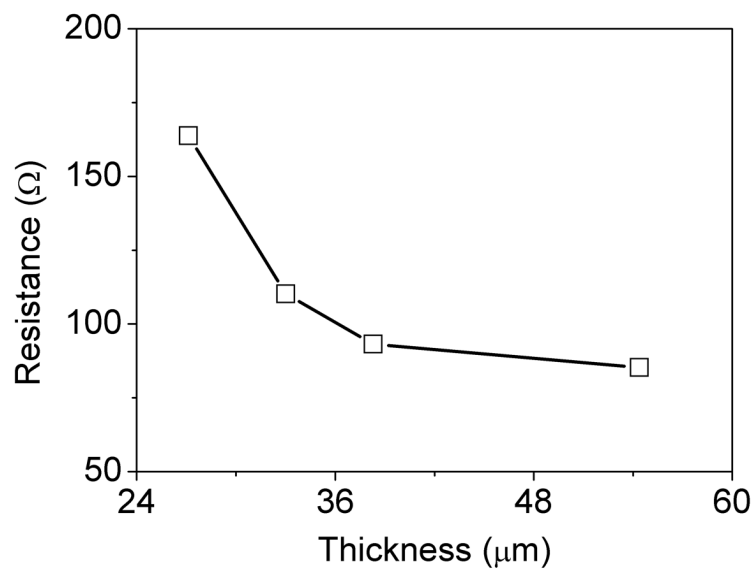

**Figure S7.** Dependence of electrical resistance on thickness of the CNT film.

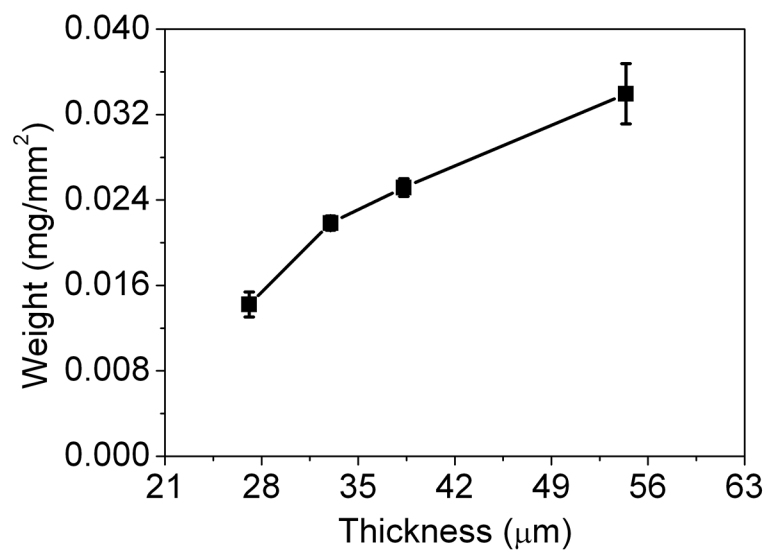

**Figure S8.** Dependence of weight of the film on thickness.

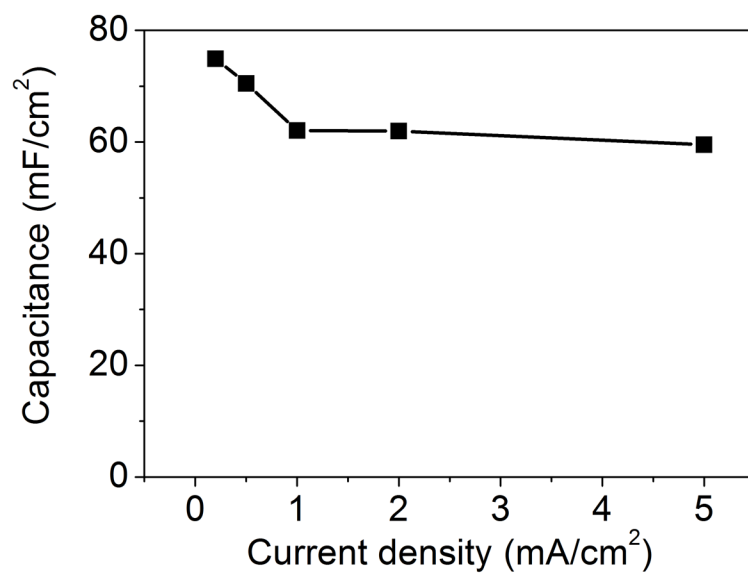

**Figure S9.** Dependence of specific capacitance on current density.

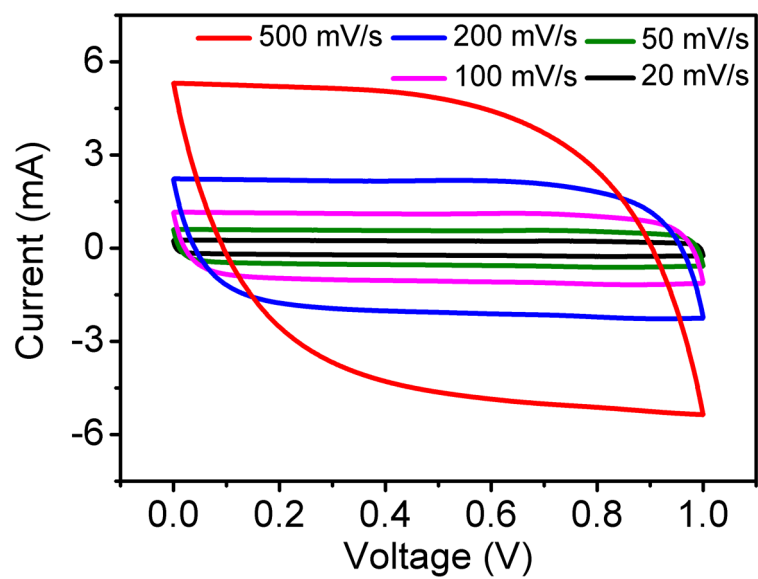

**Figure S10.** Cyclic voltammograms for the supercapacitor at increasing scan rates from 20 to 500 mV/s.

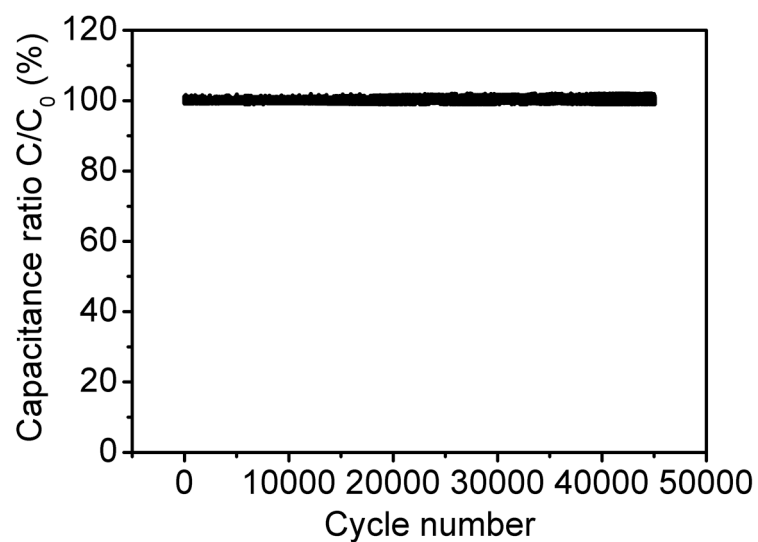

**Figure S11.** Dependence of specific capacitance on cycle number at a current density of  $1 \text{ A/cm}^2$ . Here  $C$  and  $C_0$  correspond to specific capacitances before and after stretching for different cycles, respectively.

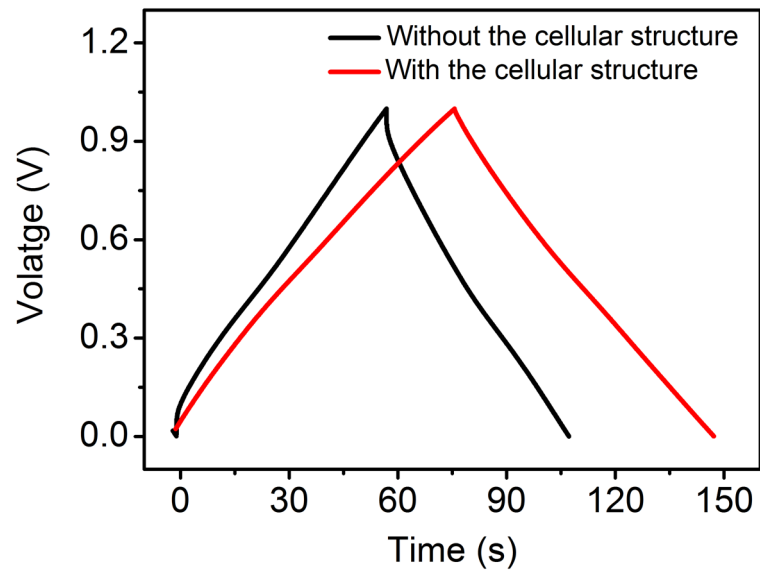

**Figure S12.** Galvanostatic charge-discharge curves for the supercapacitor with (red line) and without (black line) the cellular structure at the same area and current density of  $0.5 \text{ mA/cm}^2$ .

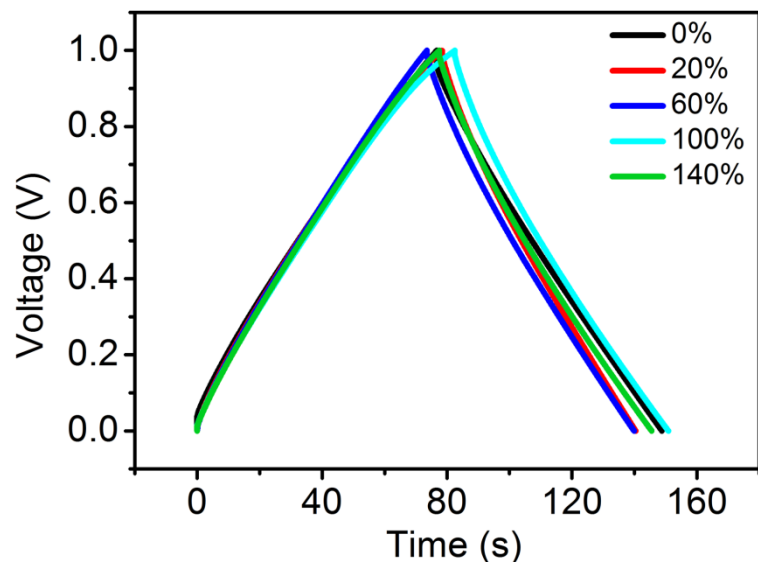

**Figure S13.** Galvanostatic charge-discharge profiles with increasing strains from 0 to 140%.



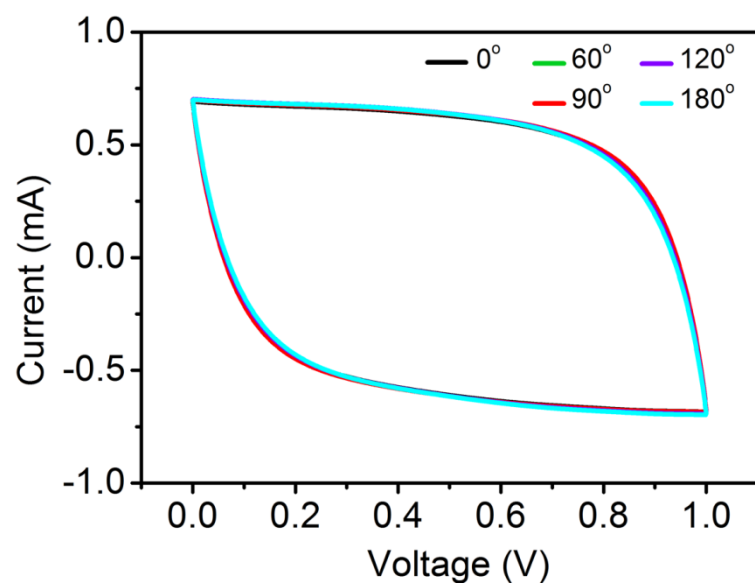

**Figure S14.** Cyclic voltammograms with increasing bending angles from 0 to 180°.

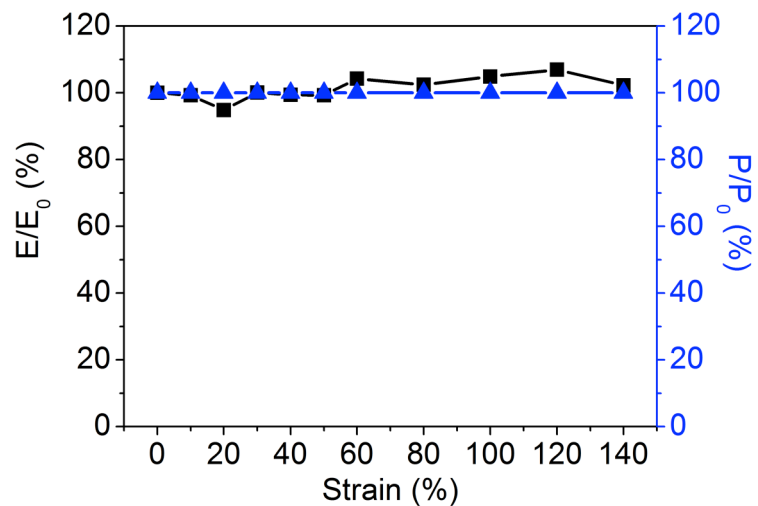

**Figure S15.** Dependence of energy and power densities on strain. Here  $E_0$  and  $E$  correspond to the energy densities before and after stretching, respectively;  $P_0$  and  $P$  correspond to the power densities before and after stretching, respectively.

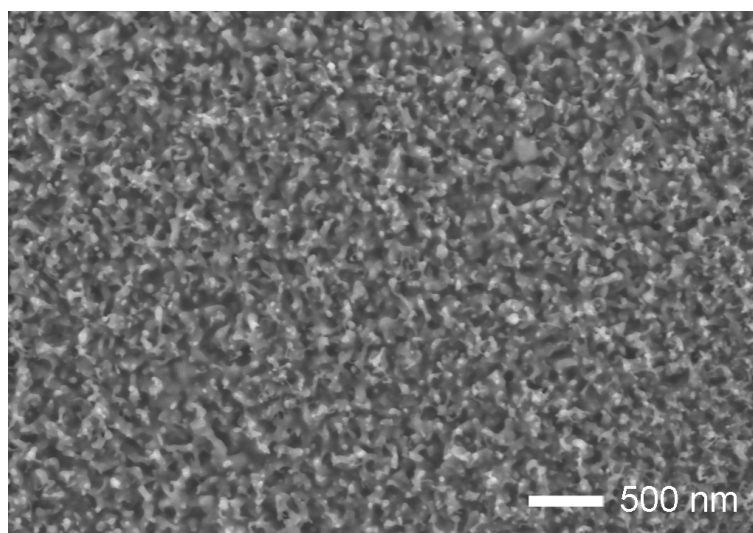

**Figure S16.** SEM image of the PANI/CNT composite film.

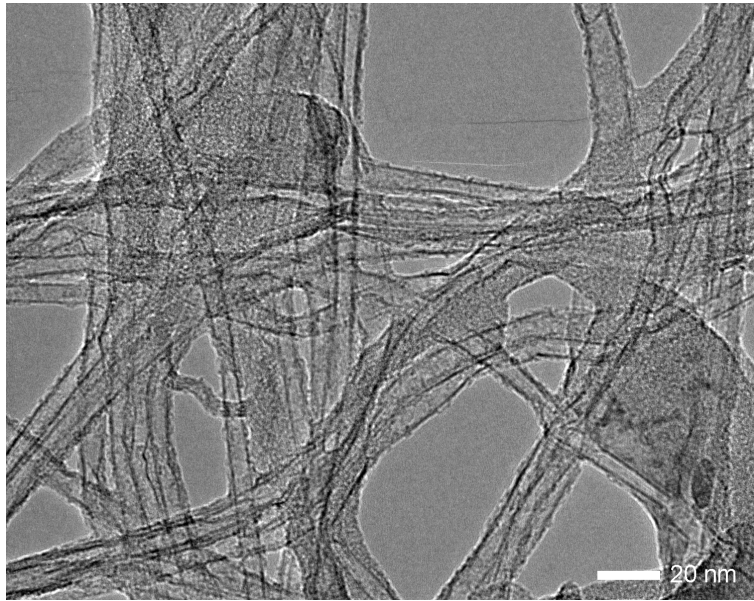

**Figure S17.** TEM image of the PANI/CNT composite.

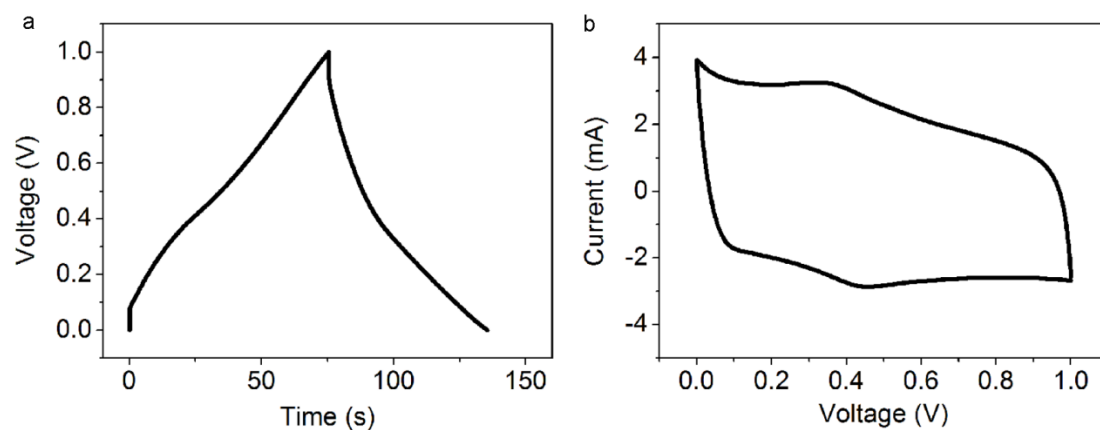

**Figure S18.** Electrochemical performances of the supercapacitors based on the CNT/PANI composites with the PANI weight percentage of 5 wt%. **(a)** Galvanostatic charge-discharge curve at a current density of 2 mA/cm<sup>2</sup>. **(b)** Cyclic voltammogram at a scan rate of 100 mV/s.
